# Supplementary material
Source: HighWire-hosted journal article supplement (https://bmjopen.bmj.com/content/9/6/e028291)
Supplement: inline-supplementary-material-2 [file inline-supplementary-material-2.pdf]

## Supplementary file 2

### Raw index scores for Frontline staff, Mid-level management and Head of department

(The item responses were measured on 1-5 point Likert scales, where the response alternative 'Strongly disagree' equals a score of 1, 'disagree' equals a score of 2, and so forth)

| Raw index scores for frontline staff, mid-level management and head of department                                       |           |                                  |                      |               |
|-------------------------------------------------------------------------------------------------------------------------|-----------|----------------------------------|----------------------|---------------|
| Indexes                                                                                                                 | Max score | Mean scores (Standard Deviation) |                      |               |
|                                                                                                                         |           | Frontline staff                  | Mid-level management | Head of dept. |
| <i>Use of data:</i>                                                                                                     |           |                                  |                      |               |
| Unit's use of data                                                                                                      | 35        | 17.5 (6.6)                       | 22.2 (4.4)           | 22.2 (5.9)    |
| <i>Aspects of registry use – indexes:</i>                                                                               |           |                                  |                      |               |
| Data quality and usefulness                                                                                             | 25        | 16.0 (2.9)                       | 16.3 (2.5)           | 17.1 (2.6)    |
| Support *                                                                                                               | 25        | 15.5 (2.6)                       | 16.4 (2.0)           | 16.2 (2.5)    |
| Resources                                                                                                               | 20        | 10.3 (2.5)                       | 12.2 (3.2)           | 12.6 (2.6)    |
| Management request for registry data                                                                                    | 20        | 9.3 (3.7)                        | 12.0 (3.6)           | 11.6 (4.2)    |
| Management involvement in registry-based quality improvement                                                            | 10        | 5.0 (2.0)                        | 6.1 (1.3)            | 5.2 (2.2)     |
| *The Support index is the index we created consisting of 5 variables, not the original Swedish version with 3 variables |           |                                  |                      |               |
